# Supplementary material for: On the intrinsic sterility of 3D printing
Source: PubMed Central journal article supplement (PMC5136128; doi:10.7717/peerj.2661), 2016-12-01
Supplement: peerj-04-2661-s002.pdf [file peerj-04-2661-s002.pdf]

| Method       | °C      | $\Delta t$ |
|--------------|---------|------------|
| HTST         | 72      | 15s        |
| UHT          | 138     | 2s         |
| stovetop     | 63      | 30m        |
| thermization | 63      | 15s        |
| flash        | 132     | 3m         |
| gravity      | 121     | 30m        |
| prevacuum    | 132     | 4m         |
| FDM          | 190-240 | 10-120s    |
